# Supplementary material for: Thermally robust and valence-variation-induced white-light emission of a novel stannate phosphor Sr3Al10SnO20:Dy3+: crystal structure, luminescence property, and mechanism investigation
Source: Royal Society of Chemistry journal article supplement (doi:10.1039/d0dt02899a), 2020-01-01
Supplement: d0dt02899a1.pdf [file d0dt02899a1.pdf]

Supporting Information

**Thermally robust and valence variation induced white light  
emission of a novel stannate phosphor  $\text{Sr}_3\text{Al}_{10}\text{SnO}_{20}:\text{Dy}^{3+}$ :  
Crystal structure, luminescence property and mechanism  
investigation**

Shuangyu Xin<sup>a,b</sup>, Miao Gao<sup>a,b</sup>, Jialing Ma<sup>b</sup>, Heng Dai<sup>a,b</sup>, Ge Zhu<sup>a,b\*</sup>

a Key Laboratory of New Energy and Rare Earth Resource Utilization of State Ethnic Affairs  
Commission, College of Physics and Materials Engineering, Dalian Minzu University, 18 Liaohe West  
Road, Dalian, 116600, P. R. China.

b College of New Energy, Bohai University, Jinzhou, 121000, P. R. China

Corresponding author' email: [zhuge06@126.com](mailto:zhuge06@126.com)

Table S1 The effective ionic radius of Dy, Sr and Sn with different valence state and  
coordinated numbers (CN ).

| ION  | OX.State | Elec.Config | CN | Ionic<br>Radius |
|------|----------|-------------|----|-----------------|
| Dy+3 | 3        | 4f9         | 6  | 0.912           |
| Dy+3 | 3        | 4f9         | 7  | 0.97            |
| Dy+3 | 3        | 4f9         | 8  | 1.027           |
| Dy+3 | 3        | 4f9         | 9  | 1.083           |
| Sn+4 | 4        | 4d10        | 4  | 0.55            |
| Sn+4 | 4        | 4d10        | 5  | 0.62            |
| Sn+4 | 4        | 4d10        | 6  | 0.69            |
| Sn+4 | 4        | 4d10        | 7  | 0.75            |

|      |   |      |    |      |
|------|---|------|----|------|
| Sn+4 | 4 | 4d10 | 8  | 0.81 |
| Sr+2 | 2 | 4p6  | 6  | 1.18 |
| Sr+2 | 2 | 4p6  | 7  | 1.21 |
| Sr+2 | 2 | 4p6  | 8  | 1.26 |
| Sr+2 | 2 | 4p6  | 9  | 1.31 |
| Sr+2 | 2 | 4p6  | 10 | 1.36 |
| Sr+2 | 2 | 4p6  | 12 | 1.44 |

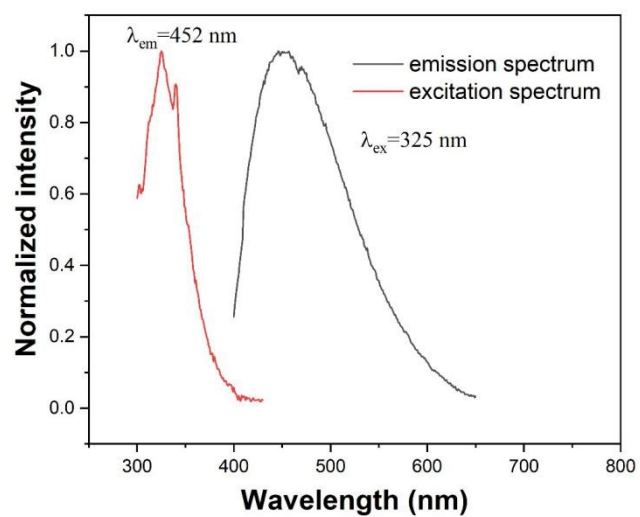

Figure S1 The excitation and emission spectra of  $\text{Sr}_3\text{Al}_{10}\text{SnO}_{20}$  host.

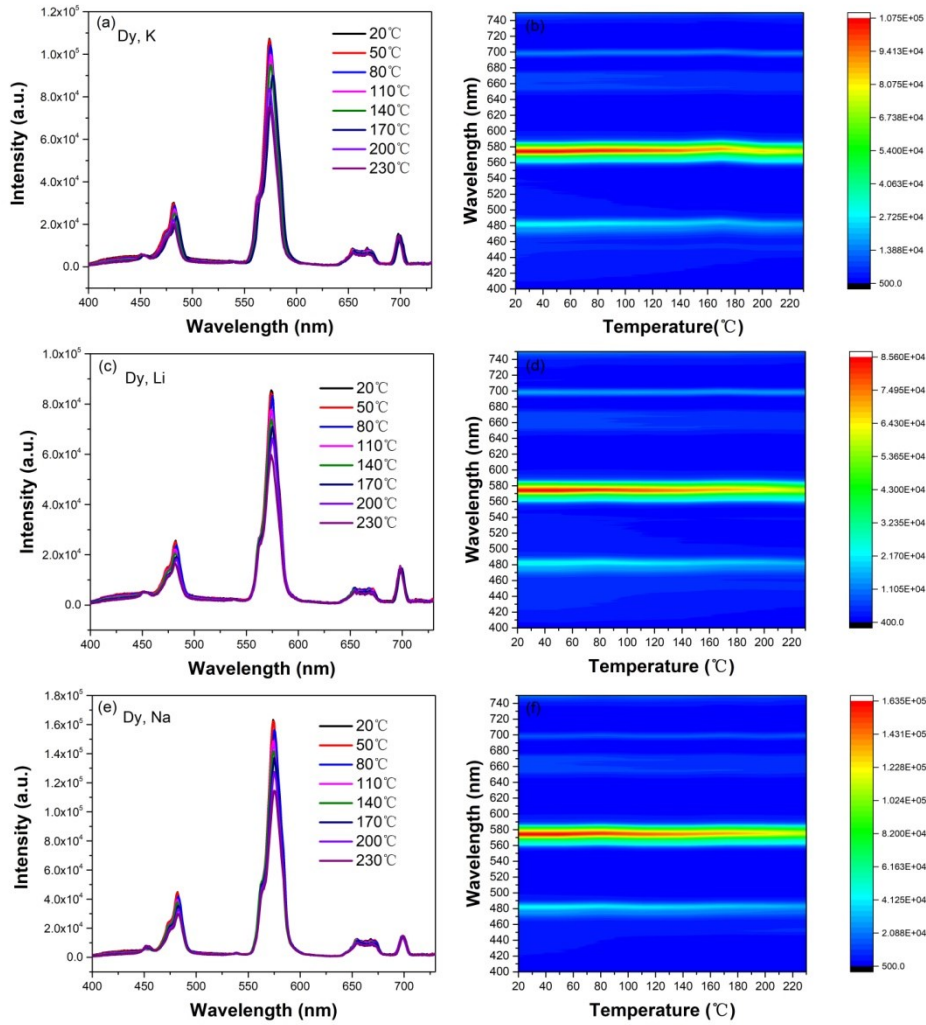

Figure S2 (a) The temperature dependent emission spectra of  $\text{Sr}_3\text{Al}_{10}\text{SnO}_{20}: 0.02\text{Dy}^{3+}, 0.02\text{K}^+$  excited at 350 nm; (b) The thermal quenching mapping diagram of  $\text{Sr}_3\text{Al}_{10}\text{SnO}_{20}: 0.02\text{Dy}^{3+}, 0.02\text{K}^+$ ; (c) The temperature dependent emission spectra of  $\text{Sr}_3\text{Al}_{10}\text{SnO}_{20}: 0.02\text{Dy}^{3+}, 0.02\text{Li}^+$  excited at 350 nm; (d) The thermal quenching mapping diagram of  $\text{Sr}_3\text{Al}_{10}\text{SnO}_{20}: 0.02\text{Dy}^{3+}, 0.02\text{Li}^+$ ; (e) The temperature dependent emission spectra of  $\text{Sr}_3\text{Al}_{10}\text{SnO}_{20}: 0.02\text{Dy}^{3+}, 0.02\text{Na}^+$  excited at 350 nm; (f) The thermal quenching mapping diagram of  $\text{Sr}_3\text{Al}_{10}\text{SnO}_{20}: 0.02\text{Dy}^{3+}, 0.02\text{Na}^+$ ;

The calculation process of the dispersion degree for the thermal quenching property is based on the following equation,

$$\Delta x = \sqrt{\sum_{i=1}^{i=n} (x_i - \bar{x})^2}, \quad \Delta y = \sqrt{\sum_{i=1}^{i=n} (y_i - \bar{y})^2},$$

Where  $x_i$  and  $y_i$  are the color coordinates at a given temperature  $t$ ,  $n$  is the number of temperature points, and  $\bar{x}$ ,  $\bar{y}$  stand for the average values of the color coordinates  $x$  and  $y$  for all the temperature points.
